# Supplementary material for: Genome-Wide Association Analysis and Genomic Prediction of Mycobacterium avium Subspecies paratuberculosis Infection in US Jersey Cattle
Source: PLOS journal article supplement (doi:10.1371/journal.pone.0088380), 2014-02-11

**A**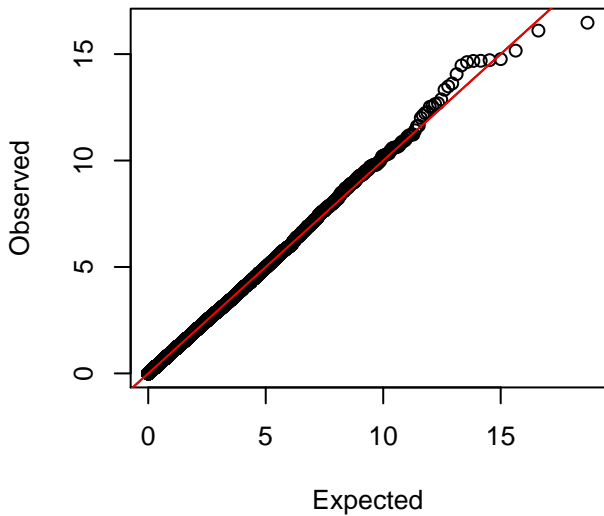**B**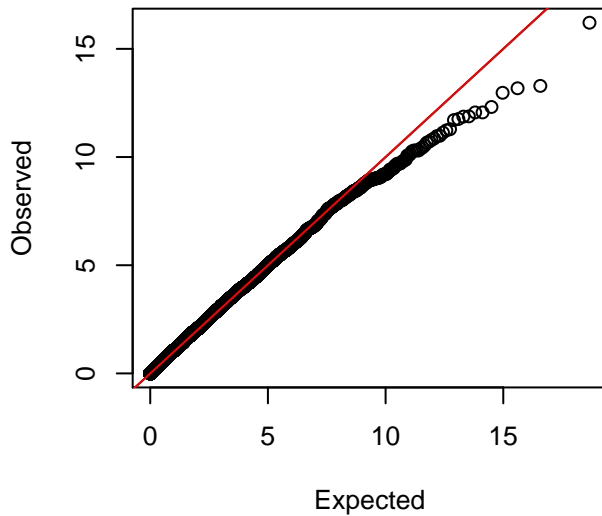**C**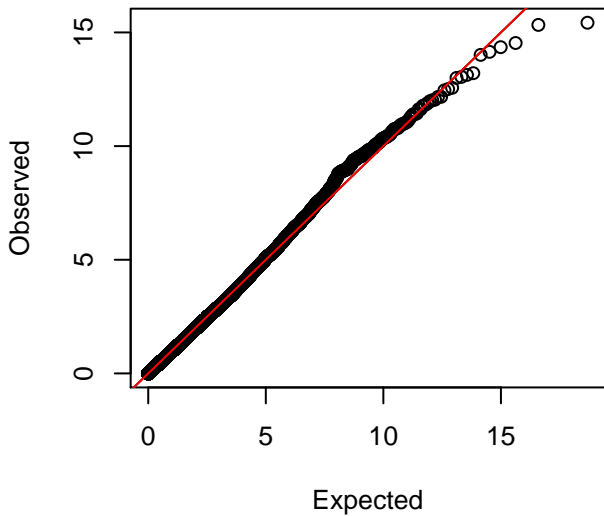

Supplement: S2 (10.1371/journal.pone.0088380.s002) [file journal.pone.0088380.s002]
